# Supplementary material for: Network Pharmacology Analysis and Experimental Validation of Kaempferol in the Treatment of Ischemic Stroke by Inhibiting Apoptosis and Regulating Neuroinflammation Involving Neutrophils
Source: MDPI journal article supplement (doi:10.3390/ijms232012694), 2022-10-21
Supplement: s1 [file s1]

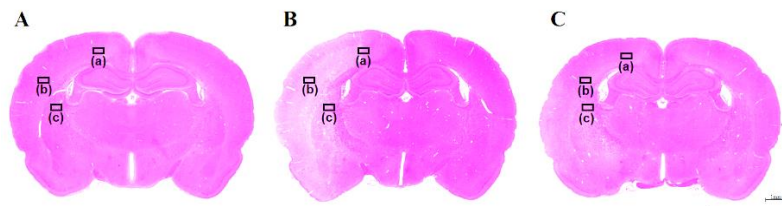

**Figure S1** Representative images of the location of (a) penumbra, (b) ischemic core and (c) striatum in ischemic brain of (A) Sham group, (B) I/R group and (C) I/R + KAE-100 group.

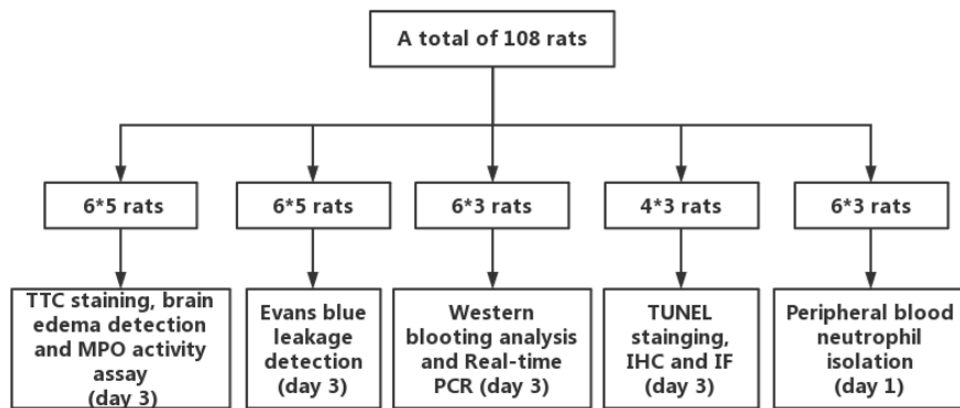

**Figure S2** The exact number of rats used in each experiment.

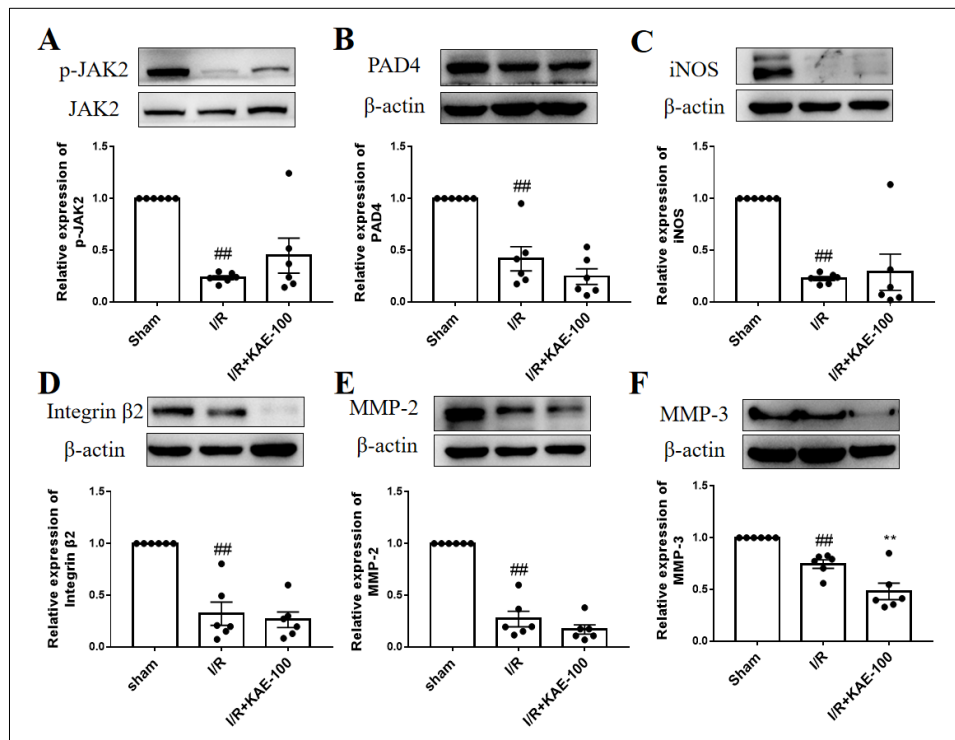

**Figure S3** The expression level of p-JAK2 (A), PAD4 (B), iNOS (C), Integrin β2 (D), MMP-2 (E) and MMP-3 (F) in ischemic cortex of rats on day 3 after I/R. Values are expressed as mean ± SEM. ##  $p < 0.01$  vs. Sham group; \*\*  $p < 0.01$  vs. I/R group.
