# Supplementary material for: Network Pharmacology Analysis and Experimental Validation of Kaempferol in the Treatment of Ischemic Stroke by Inhibiting Apoptosis and Regulating Neuroinflammation Involving Neutrophils
Source: Int J Mol Sci. 2022 Oct 21;23(20):12694. doi: 10.3390/ijms232012694 (PMC9604352; doi:10.3390/ijms232012694)
Supplement: Supplementary file 1 [file ijms-23-12694-s001.zip › Supplementary Table S1:146 GO terms.xlsx]

## Sheet: BP
Category	Term	Count	%	PValue	Genes	List Total	Pop Hits	Pop Total	Fold Enrichment	Bonferroni	Benjamini	FDR
GOTERM_BP_DIRECT	GO:0043066~negative regulation of apoptotic process	9	25.7143	2.67e-06	SRC, ADORA1, KDR, AKT1, ALOX12, MPO, MMP9, EGFR, IGF1R	35	455	16792	9.48998	0.00220032	0.00102309	0.000979691
GOTERM_BP_DIRECT	GO:0007165~signal transduction	8	22.8571	0.00766293	PLA2G1B, SRC, ADORA1, AKT1, ESR1, EGFR, ESR2, IGF1R	35	1161	16792	3.30592	0.998247	0.140487	0.134527
GOTERM_BP_DIRECT	GO:0042493~response to drug	7	20	2.9403e-05	ABCC1, ABCB1, ADORA2A, SRC, ARG1, PTGS2, ABCG2	35	304	16792	11.0474	0.023966	0.00303219	0.00290355
GOTERM_BP_DIRECT	GO:0006954~inflammatory response	7	20	0.000100081	SYK, ADORA2A, ALOX15, ADORA1, NOX4, AKT1, PTGS2	35	379	16792	8.86121	0.0792539	0.00688057	0.00658866
GOTERM_BP_DIRECT	GO:0055114~oxidation-reduction process	7	20	0.00108417	ALOX5, ALOX15, AKR1B1, NOX4, PTGS2, MPO, XDH	35	592	16792	5.67297	0.591361	0.0319442	0.030589
GOTERM_BP_DIRECT	GO:0044267~cellular protein metabolic process	6	17.1429	3.72035e-06	APP, MMP13, TTR, ADORA2A, MMP2, F2	35	118	16792	24.3952	0.00306458	0.00102309	0.000979691
GOTERM_BP_DIRECT	GO:0046777~protein autophosphorylation	6	17.1429	2.32701e-05	SYK, SRC, KDR, AKT1, EGFR, IGF1R	35	172	16792	16.7362	0.0190149	0.00274254	0.00262619
GOTERM_BP_DIRECT	GO:0006508~proteolysis	6	17.1429	0.00312687	MMP12, MMP13, MMP2, MMP3, F2, MMP9	35	500	16792	5.75726	0.924506	0.0707051	0.0677054
GOTERM_BP_DIRECT	GO:0045944~positive regulation of transcription from RNA polymerase II promoter	6	17.1429	0.0458657	APP, PARP1, PLA2G1B, AKT1, ESR1, EGFR	35	981	16792	2.93438	1	0.429372	0.411156
GOTERM_BP_DIRECT	GO:0048661~positive regulation of smooth muscle cell proliferation	5	14.2857	6.30321e-06	AKR1B1, AKT1, ALOX12, PTGS2, EGFR	35	60	16792	39.981	0.00518667	0.00130004	0.00124488
GOTERM_BP_DIRECT	GO:0030574~collagen catabolic process	5	14.2857	8.16609e-06	MMP12, MMP13, MMP2, MMP3, MMP9	35	64	16792	37.4821	0.00671441	0.0013474	0.00129024
GOTERM_BP_DIRECT	GO:0022617~extracellular matrix disassembly	5	14.2857	1.62088e-05	MMP12, MMP13, MMP2, MMP3, MMP9	35	76	16792	31.5639	0.0132834	0.00222871	0.00213416
GOTERM_BP_DIRECT	GO:0006979~response to oxidative stress	5	14.2857	6.94776e-05	APP, AKT1, PTGS2, MPO, EGFR	35	110	16792	21.8078	0.0557091	0.00587319	0.00562402
GOTERM_BP_DIRECT	GO:0001934~positive regulation of protein phosphorylation	5	14.2857	0.000121388	KDR, AKT1, F2, MMP9, EGFR	35	127	16792	18.8886	0.0952994	0.00770347	0.00737666
GOTERM_BP_DIRECT	GO:0070374~positive regulation of ERK1 and ERK2 cascade	5	14.2857	0.000414059	SRC, ALOX15, KDR, NOX4, EGFR	35	175	16792	13.7078	0.289417	0.0189777	0.0181726
GOTERM_BP_DIRECT	GO:0008283~cell proliferation	5	14.2857	0.00614412	ACHE, SYK, SRC, AKT1, EGFR	35	366	16792	6.55425	0.993808	0.117881	0.11288
GOTERM_BP_DIRECT	GO:0008285~negative regulation of cell proliferation	5	14.2857	0.00807848	CDK6, ADORA2A, ADORA1, NOX4, PTGS2	35	396	16792	6.05772	0.998759	0.144886	0.138739
GOTERM_BP_DIRECT	GO:0008284~positive regulation of cell proliferation	5	14.2857	0.0140573	KDR, ALOX12, F2, EGFR, IGF1R	35	466	16792	5.14776	0.999992	0.197023	0.188664
GOTERM_BP_DIRECT	GO:0019372~lipoxygenase pathway	4	11.4286	2.13925e-06	ALOX5, ALOX15, ALOX12, PTGS2	35	13	16792	147.622	0.00176333	0.00102309	0.000979691
GOTERM_BP_DIRECT	GO:0038083~peptidyl-tyrosine autophosphorylation	4	11.4286	7.11902e-05	SYK, SRC, KDR, IGF1R	35	40	16792	47.9771	0.0570424	0.00587319	0.00562402
GOTERM_BP_DIRECT	GO:0045429~positive regulation of nitric oxide biosynthetic process	4	11.4286	8.85546e-05	AKT1, PTGS2, ESR1, EGFR	35	43	16792	44.6299	0.0704557	0.00664159	0.00635983
GOTERM_BP_DIRECT	GO:0048146~positive regulation of fibroblast proliferation	4	11.4286	0.000175298	CDK6, PLA2G1B, ESR1, EGFR	35	54	16792	35.5386	0.13466	0.0097493	0.0093357
GOTERM_BP_DIRECT	GO:0032869~cellular response to insulin stimulus	4	11.4286	0.000500802	PARP1, PLA2G1B, SRC, AKT1	35	77	16792	24.9232	0.338513	0.0217453	0.0208228
GOTERM_BP_DIRECT	GO:0030307~positive regulation of cell growth	4	11.4286	0.000646061	AKT1, ALOX12, F2, EGFR	35	84	16792	22.8463	0.41326	0.0261617	0.0250518
GOTERM_BP_DIRECT	GO:0007169~transmembrane receptor protein tyrosine kinase signaling pathway	4	11.4286	0.000952867	SYK, KDR, EGFR, IGF1R	35	96	16792	19.9905	0.544559	0.0291154	0.0278802
GOTERM_BP_DIRECT	GO:0071456~cellular response to hypoxia	4	11.4286	0.000952867	TERT, SRC, AKT1, PTGS2	35	96	16792	19.9905	0.544559	0.0291154	0.0278802
GOTERM_BP_DIRECT	GO:0030168~platelet activation	4	11.4286	0.00160402	SYK, SRC, AKT1, F2	35	115	16792	16.6877	0.734033	0.0456317	0.0436958
GOTERM_BP_DIRECT	GO:0010629~negative regulation of gene expression	4	11.4286	0.00264216	TERT, AKT1, ESR1, XDH	35	137	16792	14.0079	0.88726	0.0629966	0.060324
GOTERM_BP_DIRECT	GO:0007568~aging	4	11.4286	0.0044581	ARG1, AKT1, ALOX12, MPO	35	165	16792	11.6308	0.974932	0.0919484	0.0880475
GOTERM_BP_DIRECT	GO:0030335~positive regulation of cell migration	4	11.4286	0.00603442	KDR, ALOX12, EGFR, IGF1R	35	184	16792	10.4298	0.993218	0.117881	0.11288
GOTERM_BP_DIRECT	GO:0001525~angiogenesis	4	11.4286	0.0102119	SYK, MMP2, KDR, PTGS2	35	223	16792	8.60577	0.99979	0.158959	0.152215
GOTERM_BP_DIRECT	GO:0043065~positive regulation of apoptotic process	4	11.4286	0.022456	SRC, NOX4, AKT1, PTGS2	35	300	16792	6.39695	1	0.278471	0.266657
GOTERM_BP_DIRECT	GO:0006810~transport	4	11.4286	0.032878	ABCC1, ABCB1, TTR, ABCG2	35	348	16792	5.51461	1	0.352264	0.33732
GOTERM_BP_DIRECT	GO:0035556~intracellular signal transduction	4	11.4286	0.0474412	SYK, PLA2G1B, SRC, AKT1	35	403	16792	4.762	1	0.429372	0.411156
GOTERM_BP_DIRECT	GO:0051901~positive regulation of mitochondrial depolarization	3	8.57143	0.00017726	PARP1, KDR, ALOX12	35	10	16792	143.931	0.13606	0.0097493	0.0093357
GOTERM_BP_DIRECT	GO:1904707~positive regulation of vascular smooth muscle cell proliferation	3	8.57143	0.000410989	TERT, MMP2, MMP9	35	15	16792	95.9543	0.287614	0.0189777	0.0181726
GOTERM_BP_DIRECT	GO:0006691~leukotriene metabolic process	3	8.57143	0.000410989	ABCC1, ALOX5, ALOX15	35	15	16792	95.9543	0.287614	0.0189777	0.0181726
GOTERM_BP_DIRECT	GO:0051968~positive regulation of synaptic transmission, glutamatergic	3	8.57143	0.000665935	ADORA2A, PTGS2, EGFR	35	19	16792	75.7534	0.422807	0.0261617	0.0250518
GOTERM_BP_DIRECT	GO:0019370~leukotriene biosynthetic process	3	8.57143	0.000738989	SYK, PLA2G1B, ALOX5	35	20	16792	71.9657	0.45659	0.0277121	0.0265364
GOTERM_BP_DIRECT	GO:0030520~intracellular estrogen receptor signaling pathway	3	8.57143	0.000815742	SRC, ESR1, ESR2	35	21	16792	68.5388	0.489958	0.0280411	0.0268515
GOTERM_BP_DIRECT	GO:1900182~positive regulation of protein localization to nucleus	3	8.57143	0.000815742	SRC, AKT1, F2	35	21	16792	68.5388	0.489958	0.0280411	0.0268515
GOTERM_BP_DIRECT	GO:0051000~positive regulation of nitric-oxide synthase activity	3	8.57143	0.000896179	TERT, AKT1, ESR1	35	22	16792	65.4234	0.522733	0.0291154	0.0278802
GOTERM_BP_DIRECT	GO:2000379~positive regulation of reactive oxygen species metabolic process	3	8.57143	0.00167058	NOX4, F2, XDH	35	30	16792	47.9771	0.748265	0.0459409	0.0439919
GOTERM_BP_DIRECT	GO:0045907~positive regulation of vasoconstriction	3	8.57143	0.00190002	AKT1, PTGS2, EGFR	35	32	16792	44.9786	0.791748	0.0505651	0.0484199
GOTERM_BP_DIRECT	GO:0030282~bone mineralization	3	8.57143	0.00214358	MMP13, ALOX15, PTGS2	35	34	16792	42.3328	0.829726	0.0552641	0.0529195
GOTERM_BP_DIRECT	GO:0050714~positive regulation of protein secretion	3	8.57143	0.00240113	ACHE, ADORA2A, PLA2G1B	35	36	16792	39.981	0.862388	0.0600284	0.0574817
GOTERM_BP_DIRECT	GO:0038128~ERBB2 signaling pathway	3	8.57143	0.00267258	SRC, AKT1, EGFR	35	38	16792	37.8767	0.890061	0.0629966	0.060324
GOTERM_BP_DIRECT	GO:0007566~embryo implantation	3	8.57143	0.00325672	MMP2, PTGS2, MMP9	35	42	16792	34.2694	0.932199	0.0707051	0.0677054
GOTERM_BP_DIRECT	GO:0045740~positive regulation of DNA replication	3	8.57143	0.00325672	PLA2G1B, EGFR, IGF1R	35	42	16792	34.2694	0.932199	0.0707051	0.0677054
GOTERM_BP_DIRECT	GO:0043406~positive regulation of MAP kinase activity	3	8.57143	0.00633421	SRC, NOX4, EGFR	35	59	16792	24.3952	0.994712	0.118766	0.113728
GOTERM_BP_DIRECT	GO:0043154~negative regulation of cysteine-type endopeptidase activity involved in apoptotic process	3	8.57143	0.00857607	ADORA2A, SRC, AKT1	35	69	16792	20.8596	0.99918	0.147401	0.141148
GOTERM_BP_DIRECT	GO:0001938~positive regulation of endothelial cell proliferation	3	8.57143	0.00857607	ARG1, KDR, AKT1	35	69	16792	20.8596	0.99918	0.147401	0.141148
GOTERM_BP_DIRECT	GO:0071260~cellular response to mechanical stimulus	3	8.57143	0.00906131	AKT1, PTGS2, EGFR	35	71	16792	20.272	0.999452	0.152563	0.146091
GOTERM_BP_DIRECT	GO:0001503~ossification	3	8.57143	0.0113927	ALOX15, MMP9, EGFR	35	80	16792	17.9914	0.999922	0.174054	0.16667
GOTERM_BP_DIRECT	GO:0051897~positive regulation of protein kinase B signaling	3	8.57143	0.0125048	SRC, NOX4, EGFR	35	84	16792	17.1347	0.999969	0.184223	0.176407
GOTERM_BP_DIRECT	GO:0048013~ephrin receptor signaling pathway	3	8.57143	0.0130781	SRC, MMP2, MMP9	35	86	16792	16.7362	0.999981	0.189288	0.181257
GOTERM_BP_DIRECT	GO:0051091~positive regulation of sequence-specific DNA binding transcription factor activity	3	8.57143	0.0190753	AKT1, ESR1, ESR2	35	105	16792	13.7078	1	0.249796	0.239199
GOTERM_BP_DIRECT	GO:0048015~phosphatidylinositol-mediated signaling	3	8.57143	0.0194178	AKT1, EGFR, IGF1R	35	106	16792	13.5784	1	0.250307	0.239688
GOTERM_BP_DIRECT	GO:0045766~positive regulation of angiogenesis	3	8.57143	0.0226152	TERT, KDR, ALOX12	35	115	16792	12.5158	1	0.278471	0.266657
GOTERM_BP_DIRECT	GO:0050900~leukocyte migration	3	8.57143	0.0252424	SRC, F2, MMP9	35	122	16792	11.7977	1	0.298075	0.285429
GOTERM_BP_DIRECT	GO:0018105~peptidyl-serine phosphorylation	3	8.57143	0.0264049	SYK, SRC, AKT1	35	125	16792	11.5145	1	0.298412	0.285752
GOTERM_BP_DIRECT	GO:0018108~peptidyl-tyrosine phosphorylation	3	8.57143	0.0382542	SRC, KDR, EGFR	35	153	16792	9.40728	1	0.389627	0.373097
GOTERM_BP_DIRECT	GO:0001666~response to hypoxia	3	8.57143	0.0472476	MMP2, ADORA1, NOX4	35	172	16792	8.36811	1	0.429372	0.411156
GOTERM_BP_DIRECT	GO:2001303~lipoxin A4 biosynthetic process	2	5.71429	0.00404557	ALOX15, ALOX12	35	2	16792	479.771	0.964717	0.0855793	0.0819487
GOTERM_BP_DIRECT	GO:0070141~response to UV-A	2	5.71429	0.00606239	AKT1, EGFR	35	3	16792	319.848	0.993374	0.117881	0.11288
GOTERM_BP_DIRECT	GO:0048143~astrocyte activation	2	5.71429	0.0100842	ADORA2A, EGFR	35	5	16792	191.909	0.999766	0.158959	0.152215
GOTERM_BP_DIRECT	GO:0051122~hepoxilin biosynthetic process	2	5.71429	0.0100842	ALOX15, ALOX12	35	5	16792	191.909	0.999766	0.158959	0.152215
GOTERM_BP_DIRECT	GO:2001300~lipoxin metabolic process	2	5.71429	0.0100842	ALOX5, ALOX12	35	5	16792	191.909	0.999766	0.158959	0.152215
GOTERM_BP_DIRECT	GO:0010042~response to manganese ion	2	5.71429	0.0120891	ARG1, PTGS2	35	6	16792	159.924	0.999956	0.181337	0.173643
GOTERM_BP_DIRECT	GO:0042908~xenobiotic transport	2	5.71429	0.0140901	ABCB1, ABCG2	35	7	16792	137.078	0.999992	0.197023	0.188664
GOTERM_BP_DIRECT	GO:0031659~positive regulation of cyclin-dependent protein serine/threonine kinase activity involved in G1/S transition of mitotic cell cycle	2	5.71429	0.0160872	AKT1, EGFR	35	8	16792	119.943	0.999998	0.221199	0.211815
GOTERM_BP_DIRECT	GO:0001973~adenosine receptor signaling pathway	2	5.71429	0.0180803	ADORA2A, ADORA1	35	9	16792	106.616	1	0.240585	0.230379
GOTERM_BP_DIRECT	GO:0010907~positive regulation of glucose metabolic process	2	5.71429	0.0180803	SRC, AKT1	35	9	16792	106.616	1	0.240585	0.230379
GOTERM_BP_DIRECT	GO:2000773~negative regulation of cellular senescence	2	5.71429	0.0220549	CDK6, TERT	35	11	16792	87.2312	1	0.278471	0.266657
GOTERM_BP_DIRECT	GO:0071498~cellular response to fluid shear stress	2	5.71429	0.0240363	SRC, PTGS2	35	12	16792	79.9619	1	0.291617	0.279245
GOTERM_BP_DIRECT	GO:0001878~response to yeast	2	5.71429	0.0260138	APP, MPO	35	13	16792	73.811	1	0.298075	0.285429
GOTERM_BP_DIRECT	GO:2000573~positive regulation of DNA biosynthetic process	2	5.71429	0.0260138	SRC, NOX4	35	13	16792	73.811	1	0.298075	0.285429
GOTERM_BP_DIRECT	GO:0045780~positive regulation of bone resorption	2	5.71429	0.0260138	SYK, EGFR	35	13	16792	73.811	1	0.298075	0.285429
GOTERM_BP_DIRECT	GO:0042554~superoxide anion generation	2	5.71429	0.0279875	NOX4, ALOX12	35	14	16792	68.5388	1	0.303811	0.290922
GOTERM_BP_DIRECT	GO:0048009~insulin-like growth factor receptor signaling pathway	2	5.71429	0.0279875	AKT1, IGF1R	35	14	16792	68.5388	1	0.303811	0.290922
GOTERM_BP_DIRECT	GO:0060065~uterus development	2	5.71429	0.0279875	SRC, ESR1	35	14	16792	68.5388	1	0.303811	0.290922
GOTERM_BP_DIRECT	GO:0030225~macrophage differentiation	2	5.71429	0.0358432	PARP1, MMP9	35	18	16792	53.3079	1	0.379111	0.363028
GOTERM_BP_DIRECT	GO:0043393~regulation of protein binding	2	5.71429	0.0377975	APP, SRC	35	19	16792	50.5023	1	0.389627	0.373097
GOTERM_BP_DIRECT	GO:0006855~drug transmembrane transport	2	5.71429	0.0377975	ABCB1, ABCG2	35	19	16792	50.5023	1	0.389627	0.373097
GOTERM_BP_DIRECT	GO:0014911~positive regulation of smooth muscle cell migration	2	5.71429	0.039748	SRC, NOX4	35	20	16792	47.9771	1	0.399903	0.382938
GOTERM_BP_DIRECT	GO:0045861~negative regulation of proteolysis	2	5.71429	0.0416946	AKT1, F2	35	21	16792	45.6925	1	0.4095	0.392128
GOTERM_BP_DIRECT	GO:0032094~response to food	2	5.71429	0.0416946	AKT1, MPO	35	21	16792	45.6925	1	0.4095	0.392128
GOTERM_BP_DIRECT	GO:2001243~negative regulation of intrinsic apoptotic signaling pathway	2	5.71429	0.0436374	SRC, MMP9	35	22	16792	43.6156	1	0.418614	0.400855
GOTERM_BP_DIRECT	GO:0045453~bone resorption	2	5.71429	0.0436374	SRC, NOX4	35	22	16792	43.6156	1	0.418614	0.400855
GOTERM_BP_DIRECT	GO:0035924~cellular response to vascular endothelial growth factor stimulus	2	5.71429	0.0455763	KDR, AKT1	35	23	16792	41.7193	1	0.429372	0.411156
GOTERM_BP_DIRECT	GO:0045742~positive regulation of epidermal growth factor receptor signaling pathway	2	5.71429	0.0475115	AKT1, MMP9	35	24	16792	39.981	1	0.429372	0.411156
GOTERM_BP_DIRECT	GO:0050715~positive regulation of cytokine secretion	2	5.71429	0.0494428	SYK, SRC	35	25	16792	38.3817	1	0.429372	0.411156
GOTERM_BP_DIRECT	GO:0046686~response to cadmium ion	2	5.71429	0.0494428	TERT, ARG1	35	25	16792	38.3817	1	0.429372	0.411156
GOTERM_BP_DIRECT	GO:0019369~arachidonic acid metabolic process	2	5.71429	0.0494428	ALOX15, ALOX12	35	25	16792	38.3817	1	0.429372	0.411156
GOTERM_BP_DIRECT	GO:0060135~maternal process involved in female pregnancy	2	5.71429	0.0494428	ARG1, AKR1B1	35	25	16792	38.3817	1	0.429372	0.411156

## Sheet: CC
Category	Term	Count	%	PValue	Genes	List Total	Pop Hits	Pop Total	Fold Enrichment	Bonferroni	Benjamini	FDR
GOTERM_CC_DIRECT	GO:0005886~plasma membrane	18	51.4286	0.000424729	ACHE, APP, ABCC1, ABCB1, SYK, SRC, MMP2, ALOX15, F2, ESR1, EGFR, IGF1R, ADORA2A, TERT, ADORA1, KDR, AKT1, ABCG2	35	4121	18224	2.27429	0.0541311	0.0185465	0.0172723
GOTERM_CC_DIRECT	GO:0005615~extracellular space	15	42.8571	4.63012e-08	ACHE, APP, PLA2G1B, ARG1, MMP2, MMP3, AKR1B1, F2, MPO, MMP9, EGFR, MMP13, TTR, ALOX5, XDH	35	1347	18224	5.79828	6.06544e-06	6.06546e-06	5.64875e-06
GOTERM_CC_DIRECT	GO:0005576~extracellular region	12	34.2857	0.000104423	MMP12, ACHE, APP, MMP13, TTR, PLA2G1B, MMP2, MMP3, KDR, F2, MMP9, ESR2	35	1610	18224	3.88089	0.013587	0.00683973	0.00636982
GOTERM_CC_DIRECT	GO:0070062~extracellular exosome	11	31.4286	0.0284877	APP, ABCC1, ABCB1, TTR, SRC, ARG1, AKR1B1, ALOX12, F2, MPO, MMP9	35	2811	18224	2.03755	0.977316	0.275555	0.256624
GOTERM_CC_DIRECT	GO:0016020~membrane	10	28.5714	0.0168686	ACHE, ABCC1, ABCB1, ADORA2A, PARP1, ALOX15, ALOX12, ESR1, EGFR, IGF1R	35	2200	18224	2.36675	0.892325	0.210905	0.196416
GOTERM_CC_DIRECT	GO:0005739~mitochondrion	7	20	0.0345897	PARP1, SRC, MMP2, NOX4, AKT1, MPO, ESR2	35	1331	18224	2.73839	0.990063	0.302083	0.28133
GOTERM_CC_DIRECT	GO:0048471~perinuclear region of cytoplasm	6	17.1429	0.00554865	ACHE, APP, SRC, AKR1B1, NOX4, EGFR	35	621	18224	5.03078	0.517559	0.133351	0.124189
GOTERM_CC_DIRECT	GO:0005578~proteinaceous extracellular matrix	5	14.2857	0.00149878	MMP12, MMP13, MMP2, MMP3, MMP9	35	268	18224	9.71429	0.178388	0.0490849	0.0457126
GOTERM_CC_DIRECT	GO:0043234~protein complex	5	14.2857	0.00698477	TTR, SYK, PARP1, AKT1, PTGS2	35	412	18224	6.319	0.600769	0.133351	0.124189
GOTERM_CC_DIRECT	GO:0009986~cell surface	5	14.2857	0.0177096	ACHE, APP, ABCB1, PLA2G1B, EGFR	35	542	18224	4.80337	0.903744	0.210905	0.196416
GOTERM_CC_DIRECT	GO:0031234~extrinsic component of cytoplasmic side of plasma membrane	3	8.57143	0.00712561	SYK, SRC, ALOX15	35	68	18224	22.9714	0.608119	0.133351	0.124189
GOTERM_CC_DIRECT	GO:0043235~receptor complex	3	8.57143	0.0233725	APP, EGFR, IGF1R	35	127	18224	12.2997	0.954867	0.25515	0.237621
GOTERM_CC_DIRECT	GO:0016323~basolateral plasma membrane	3	8.57143	0.0442732	ABCC1, ADORA1, EGFR	35	180	18224	8.6781	0.997347	0.335188	0.31216
GOTERM_CC_DIRECT	GO:0045202~synapse	3	8.57143	0.0447165	ACHE, APP, EGFR	35	181	18224	8.63015	0.997504	0.335188	0.31216
GOTERM_CC_DIRECT	GO:0014069~postsynaptic density	3	8.57143	0.0460564	ADORA2A, SRC, ADORA1	35	184	18224	8.48944	0.997923	0.335188	0.31216
GOTERM_CC_DIRECT	GO:0032279~asymmetric synapse	2	5.71429	0.0148311	ADORA2A, ADORA1	35	8	18224	130.171	0.858779	0.210905	0.196416
GOTERM_CC_DIRECT	GO:0005641~nuclear envelope lumen	2	5.71429	0.0148311	APP, ALOX5	35	8	18224	130.171	0.858779	0.210905	0.196416
GOTERM_CC_DIRECT	GO:0030673~axolemma	2	5.71429	0.0294486	ADORA2A, ADORA1	35	16	18224	65.0857	0.980074	0.275555	0.256624

## Sheet: MF
Category	Term	Count	%	PValue	Genes	List Total	Pop Hits	Pop Total	Fold Enrichment	Bonferroni	Benjamini	FDR
GOTERM_MF_DIRECT	GO:0005515~protein binding	27	77.1429	0.00304428	APP, ACHE, ABCB1, SRC, ALOX15, ALOX12, PTGS2, EGFR, IGF1R, TTR, TERT, ALOX5, ADORA1, KDR, AKT1, SYK, PARP1, MMP2, MMP3, F2, MMP9, ESR1, ESR2, CDK6, ADORA2A, NOX4, ABCG2	35	8785	16881	1.48235	0.422361	0.0421515	0.0365313
GOTERM_MF_DIRECT	GO:0005524~ATP binding	10	28.5714	0.00223319	ABCC1, ABCB1, CDK6, SYK, SRC, KDR, AKT1, EGFR, ABCG2, IGF1R	35	1495	16881	3.22618	0.331302	0.0396767	0.0343865
GOTERM_MF_DIRECT	GO:0019899~enzyme binding	9	25.7143	2.44757e-07	APP, ADORA2A, PARP1, SRC, AKT1, PTGS2, ESR1, EGFR, ESR2	35	333	16881	13.0355	4.40552e-05	4.40562e-05	3.8182e-05
GOTERM_MF_DIRECT	GO:0042802~identical protein binding	9	25.7143	9.4031e-05	APP, TTR, ADORA2A, PARP1, AKT1, ESR1, MMP9, EGFR, IGF1R	35	749	16881	5.7955	0.0167839	0.00441214	0.00382386
GOTERM_MF_DIRECT	GO:0008270~zinc ion binding	8	22.8571	0.00772816	MMP12, MMP13, PARP1, MMP2, MMP3, ESR1, MMP9, ESR2	35	1169	16881	3.3007	0.752531	0.0578362	0.0501247
GOTERM_MF_DIRECT	GO:0004252~serine-type endopeptidase activity	6	17.1429	0.000147071	MMP12, MMP13, MMP2, MMP3, F2, MMP9	35	255	16881	11.3486	0.0261274	0.00441214	0.00382386
GOTERM_MF_DIRECT	GO:0004222~metalloendopeptidase activity	5	14.2857	7.56035e-05	MMP12, MMP13, MMP2, MMP3, MMP9	35	113	16881	21.3413	0.013517	0.00441214	0.00382386
GOTERM_MF_DIRECT	GO:0004713~protein tyrosine kinase activity	5	14.2857	0.000142176	SYK, SRC, KDR, EGFR, IGF1R	35	133	16881	18.1321	0.0252688	0.00441214	0.00382386
GOTERM_MF_DIRECT	GO:0005178~integrin binding	4	11.4286	0.00121622	SYK, SRC, KDR, EGFR	35	105	16881	18.3739	0.196721	0.0243244	0.0210812
GOTERM_MF_DIRECT	GO:0020037~heme binding	4	11.4286	0.00260312	SRC, NOX4, PTGS2, MPO	35	137	16881	14.0822	0.374481	0.0396767	0.0343865
GOTERM_MF_DIRECT	GO:0005506~iron ion binding	4	11.4286	0.00355549	ALOX5, ALOX15, ALOX12, XDH	35	153	16881	12.6095	0.473303	0.0426098	0.0369285
GOTERM_MF_DIRECT	GO:0005102~receptor binding	4	11.4286	0.0336352	APP, PLA2G1B, SRC, F2	35	353	16881	5.46532	0.997885	0.195301	0.169261
GOTERM_MF_DIRECT	GO:0004672~protein kinase activity	4	11.4286	0.0350987	SYK, SRC, AKT1, EGFR	35	359	16881	5.37398	0.99839	0.19743	0.171106
GOTERM_MF_DIRECT	GO:0030235~nitric-oxide synthase regulator activity	3	8.57143	0.000109417	AKT1, ESR1, EGFR	35	8	16881	180.868	0.0195035	0.00441214	0.00382386
GOTERM_MF_DIRECT	GO:0004716~receptor signaling protein tyrosine kinase activity	3	8.57143	0.000175405	SYK, KDR, EGFR	35	10	16881	144.694	0.0310824	0.00451042	0.00390903
GOTERM_MF_DIRECT	GO:0016702~oxidoreductase activity, acting on single donors with incorporation of molecular oxygen, incorporation of two atoms of oxygen	3	8.57143	0.00035292	ALOX5, ALOX15, ALOX12	35	14	16881	103.353	0.0615605	0.00794071	0.00688195
GOTERM_MF_DIRECT	GO:0004714~transmembrane receptor protein tyrosine kinase activity	3	8.57143	0.00264511	KDR, EGFR, IGF1R	35	38	16881	38.0774	0.379203	0.0396767	0.0343865
GOTERM_MF_DIRECT	GO:0042626~ATPase activity, coupled to transmembrane movement of substances	3	8.57143	0.00353264	ABCC1, ABCB1, ABCG2	35	44	16881	32.8851	0.471124	0.0426098	0.0369285
GOTERM_MF_DIRECT	GO:0004175~endopeptidase activity	3	8.57143	0.00527697	MMP12, MMP3, MMP9	35	54	16881	26.7952	0.614174	0.0516899	0.0447979
GOTERM_MF_DIRECT	GO:0005518~collagen binding	3	8.57143	0.00647804	ACHE, MMP13, MMP9	35	60	16881	24.1157	0.689583	0.0530021	0.0459352
GOTERM_MF_DIRECT	GO:0008237~metallopeptidase activity	3	8.57143	0.0115497	MMP2, MMP3, MMP9	35	81	16881	17.8635	0.876443	0.071688	0.0621296
GOTERM_MF_DIRECT	GO:0009055~electron carrier activity	3	8.57143	0.0141167	AKR1B1, NOX4, XDH	35	90	16881	16.0771	0.922627	0.0847004	0.073407
GOTERM_MF_DIRECT	GO:0038052~RNA polymerase II transcription factor activity, estrogen-activated sequence-specific DNA binding	2	5.71429	0.00402426	ESR1, ESR2	35	2	16881	482.314	0.516076	0.0426098	0.0369285
GOTERM_MF_DIRECT	GO:0047977~hepoxilin-epoxide hydrolase activity	2	5.71429	0.00402426	ALOX15, ALOX12	35	2	16881	482.314	0.516076	0.0426098	0.0369285
GOTERM_MF_DIRECT	GO:0004052~arachidonate 12-lipoxygenase activity	2	5.71429	0.00603049	ALOX15, ALOX12	35	3	16881	321.543	0.663371	0.0516899	0.0447979
GOTERM_MF_DIRECT	GO:0050473~arachidonate 15-lipoxygenase activity	2	5.71429	0.00603049	ALOX15, PTGS2	35	3	16881	321.543	0.663371	0.0516899	0.0447979
GOTERM_MF_DIRECT	GO:0051120~hepoxilin A3 synthase activity	2	5.71429	0.00603049	ALOX15, ALOX12	35	3	16881	321.543	0.663371	0.0516899	0.0447979
GOTERM_MF_DIRECT	GO:0034056~estrogen response element binding	2	5.71429	0.0080328	ESR1, ESR2	35	4	16881	241.157	0.765838	0.0578362	0.0501247
GOTERM_MF_DIRECT	GO:0070851~growth factor receptor binding	2	5.71429	0.0080328	APP, SRC	35	4	16881	241.157	0.765838	0.0578362	0.0501247
GOTERM_MF_DIRECT	GO:0008559~xenobiotic-transporting ATPase activity	2	5.71429	0.0100312	ABCB1, ABCG2	35	5	16881	192.926	0.837118	0.0644862	0.0558881
GOTERM_MF_DIRECT	GO:0001609~G-protein coupled adenosine receptor activity	2	5.71429	0.0100312	ADORA2A, ADORA1	35	5	16881	192.926	0.837118	0.0644862	0.0558881
GOTERM_MF_DIRECT	GO:0030284~estrogen receptor activity	2	5.71429	0.0100312	ESR1, ESR2	35	5	16881	192.926	0.837118	0.0644862	0.0558881
GOTERM_MF_DIRECT	GO:0004601~peroxidase activity	2	5.71429	0.043412	PTGS2, MPO	35	22	16881	43.8468	0.999661	0.236793	0.20522
