# Supplementary material for: Network Pharmacology Analysis and Experimental Validation of Kaempferol in the Treatment of Ischemic Stroke by Inhibiting Apoptosis and Regulating Neuroinflammation Involving Neutrophils
Source: Int J Mol Sci. 2022 Oct 21;23(20):12694. doi: 10.3390/ijms232012694 (PMC9604352; doi:10.3390/ijms232012694)
Supplement: Supplementary file 1 [file ijms-23-12694-s001.zip › Supplementary Table S2:24 KEGG enrichment pathways.xlsx]

## Sheet: Sheet1
Term	Count	%	PValue	Genes	List Total	Pop Hits	Pop Total	Fold Enrichment	Bonferroni	Benjamini	FDR	Log（FDR）
hsa05205:Proteoglycans in cancer	8	22.8571	1.82283e-05	SRC, MMP2, KDR, AKT1, ESR1, MMP9, EGFR, IGF1R	31	200	6879	8.87613	0.00238508	0.00119395	0.0010299	-2.98721
hsa04915:Estrogen signaling pathway	7	20	3.4257e-06	SRC, MMP2, AKT1, ESR1, MMP9, EGFR, ESR2	31	99	6879	15.6901	0.000448667	0.000448767	0.000387105	-3.41217
hsa05200:Pathways in cancer	7	20	0.0061612	CDK6, MMP2, AKT1, PTGS2, MMP9, EGFR, IGF1R	31	393	6879	3.95247	0.55497	0.0733743	0.0632923	-1.19865
hsa04015:Rap1 signaling pathway	6	17.1429	0.00193188	ADORA2A, SRC, KDR, AKT1, EGFR, IGF1R	31	210	6879	6.34009	0.223782	0.0421794	0.0363838	-1.43909
hsa05206:MicroRNAs in cancer	6	17.1429	0.00726831	ABCC1, ABCB1, CDK6, PTGS2, MMP9, EGFR	31	286	6879	4.65531	0.615429	0.0793458	0.0684433	-1.16467
hsa04151:PI3K-Akt signaling pathway	6	17.1429	0.0155945	CDK6, SYK, KDR, AKT1, EGFR, IGF1R	31	345	6879	3.85919	0.872416	0.122501	0.105669	-0.976053
hsa00590:Arachidonic acid metabolism	5	14.2857	0.000129085	PLA2G1B, ALOX5, ALOX15, ALOX12, PTGS2	31	61	6879	18.1888	0.0167691	0.00563673	0.00486221	-2.31317
hsa04726:Serotonergic synapse	5	14.2857	0.00127334	APP, ALOX5, ALOX15, ALOX12, PTGS2	31	111	6879	9.99564	0.153727	0.0333615	0.0287774	-1.54095
hsa04510:Focal adhesion	5	14.2857	0.0116259	SRC, KDR, AKT1, EGFR, IGF1R	31	206	6879	5.386	0.783879	0.108785	0.0938376	-1.02762
hsa04014:Ras signaling pathway	5	14.2857	0.0158971	PLA2G1B, KDR, AKT1, EGFR, IGF1R	31	226	6879	4.90936	0.877452	0.122501	0.105669	-0.976053
hsa05219:Bladder cancer	4	11.4286	0.00071359	SRC, MMP2, MMP9, EGFR	31	41	6879	21.6491	0.0892745	0.0233701	0.0201589	-1.69553
hsa04370:VEGF signaling pathway	4	11.4286	0.00227175	SRC, KDR, AKT1, PTGS2	31	61	6879	14.551	0.257652	0.0425142	0.0366725	-1.43566
hsa05214:Glioma	4	11.4286	0.00272499	CDK6, AKT1, EGFR, IGF1R	31	65	6879	13.6556	0.30055	0.0446216	0.0384904	-1.41465
hsa04917:Prolactin signaling pathway	4	11.4286	0.00350343	SRC, AKT1, ESR1, ESR2	31	71	6879	12.5016	0.368562	0.045895	0.0395888	-1.40243
hsa05218:Melanoma	4	11.4286	0.00350343	CDK6, AKT1, EGFR, IGF1R	31	71	6879	12.5016	0.368562	0.045895	0.0395888	-1.40243
hsa04668:TNF signaling pathway	4	11.4286	0.0109499	MMP3, AKT1, PTGS2, MMP9	31	107	6879	8.29545	0.763629	0.108785	0.0938376	-1.02762
hsa05161:Hepatitis B	4	11.4286	0.0245747	CDK6, SRC, AKT1, MMP9	31	145	6879	6.12147	0.961592	0.153299	0.132235	-0.878653
hsa05202:Transcriptional misregulation in cancer	4	11.4286	0.0353159	MMP3, MPO, MMP9, IGF1R	31	167	6879	5.31505	0.990996	0.201147	0.173509	-0.760679
hsa02010:ABC transporters	3	8.57143	0.0155269	ABCC1, ABCB1, ABCG2	31	44	6879	15.1298	0.871262	0.122501	0.105669	-0.976053
hsa04913:Ovarian steroidogenesis	3	8.57143	0.0190441	ALOX5, PTGS2, IGF1R	31	49	6879	13.5859	0.919447	0.138599	0.119555	-0.922433
hsa05223:Non-small cell lung cancer	3	8.57143	0.0244743	CDK6, AKT1, EGFR	31	56	6879	11.8877	0.961071	0.153299	0.132235	-0.878653
hsa04923:Regulation of lipolysis in adipocytes	3	8.57143	0.0244743	ADORA1, AKT1, PTGS2	31	56	6879	11.8877	0.961071	0.153299	0.132235	-0.878653
hsa05212:Pancreatic cancer	3	8.57143	0.0322684	CDK6, AKT1, EGFR	31	65	6879	10.2417	0.986389	0.192144	0.165742	-0.780567
hsa04520:Adherens junction	3	8.57143	0.0379377	SRC, EGFR, IGF1R	31	71	6879	9.37619	0.993696	0.207076	0.178623	-0.748062
